# Supplementary material for: Structure elucidation of the unprecedented asymmetric bis-chelate complex [Pd(1,3-bis(di(o-methoxy-m-methylphenyl)phosphino)propane)2]2+ in the solid state and in solution
Source: Royal Society of Chemistry journal article supplement (doi:10.1039/c0dt00699h), 2010-01-01

Figure S1 : Plot of the normalized relative intensities of the intermediate / the mono complex versus the time, as measured by  $^1\text{H}$ -NMR spectroscopy. The arrow indicates when the mono complex formation was completed.

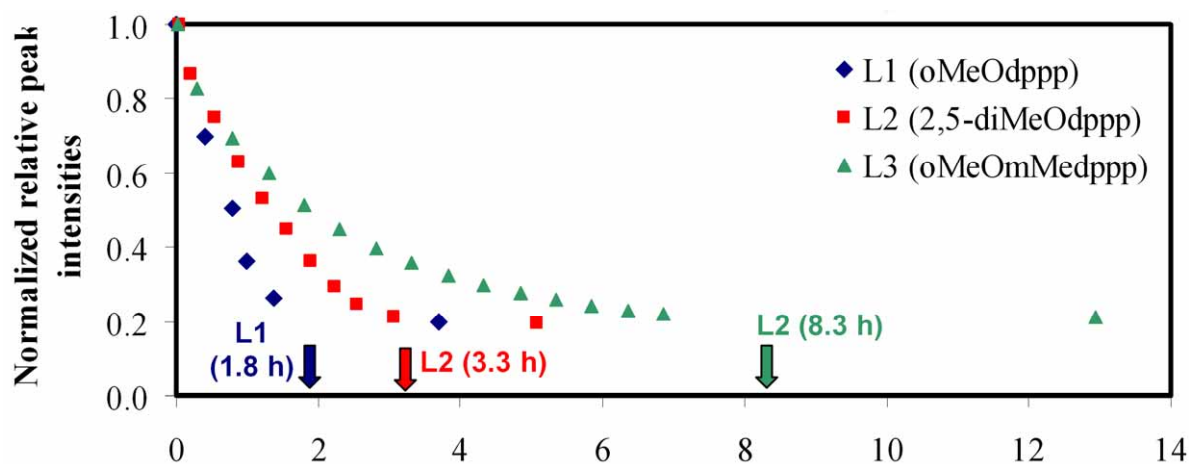

Figure S2: Plot of the  $^1\text{H}$  (left) and  $^{31}\text{P}$  (right) NMR spectra of  $[\text{Pd}(\text{L3})_2](\text{OTs})_2$  in  $(\text{CD}_3)_2\text{CO}$  (top) and  $[\text{Pd}(\text{L3})_2](\text{OAc})_2$  in  $\text{MeOD}/\text{CD}_2\text{Cl}_2$  (bottom), showing that the structure of the complex is the same for both anions.

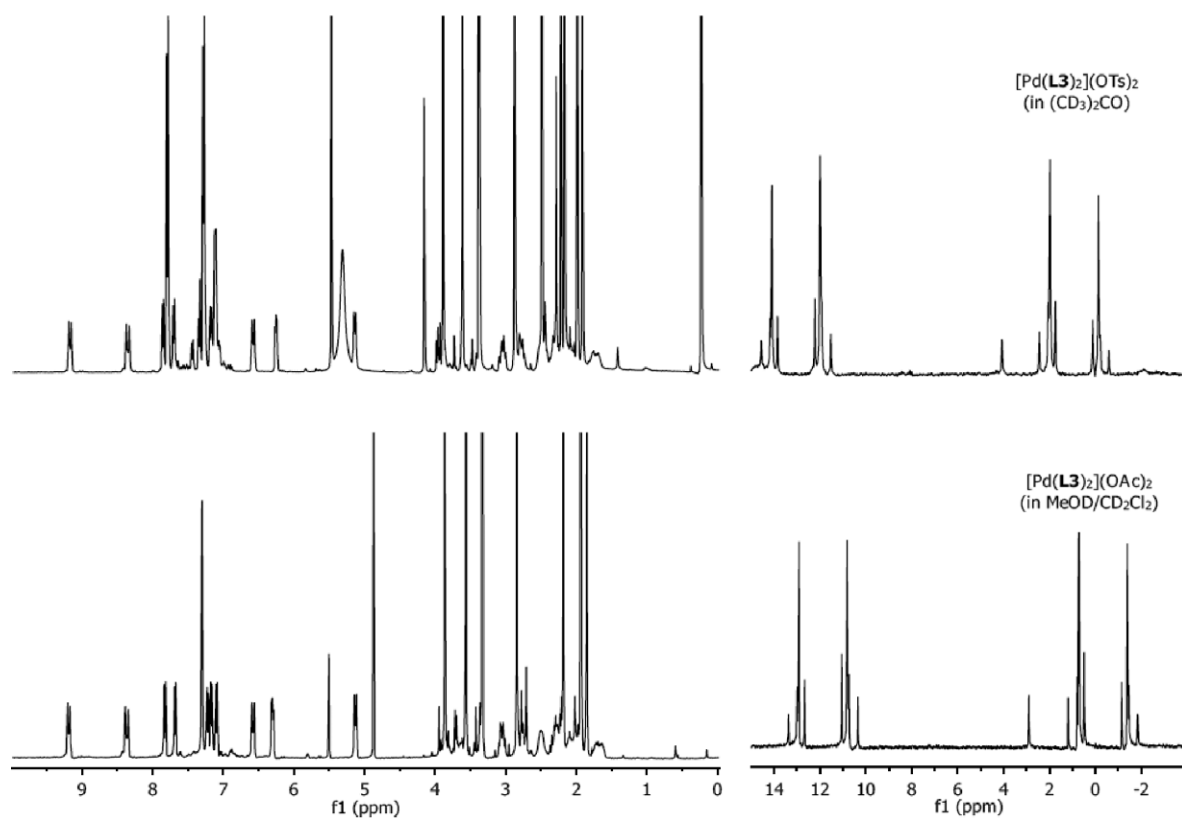

Figure S3: Plot of the  $^1\text{H}$ - (top) and  $^1\text{H}\{^{31}\text{P}\}$ - (bottom) NMR spectra of  $[\text{Pd}(\text{L}3)_2](\text{OTs})_2$  in  $(\text{CD}_3)_2\text{CO}$ .

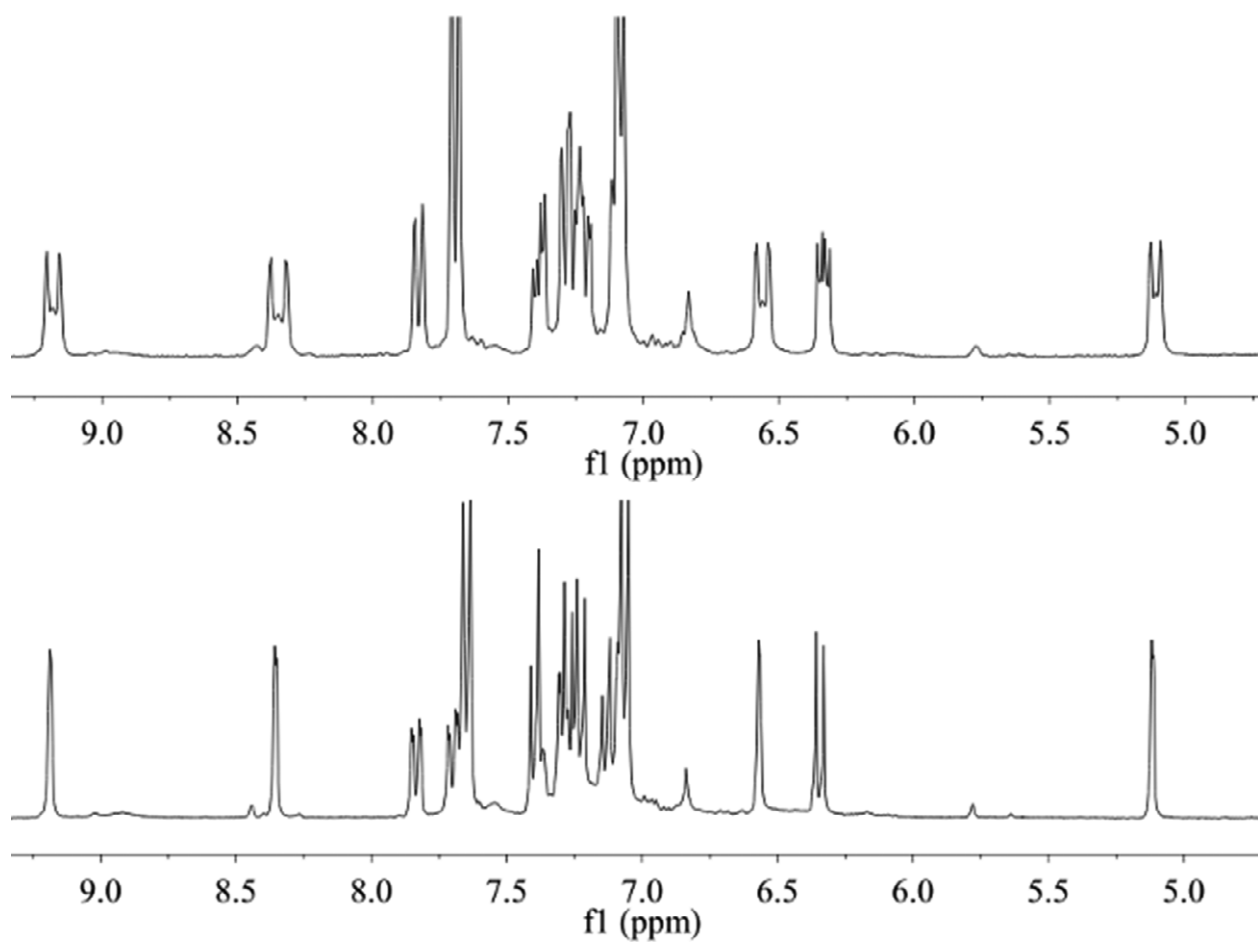

Supplement: c0dt00699h.pdf [file c0dt00699h.pdf]
